# Supplementary material for: 3D Composite U(VI) Adsorbents Based on Alginate Hydrogels and Oxidized Biochar Obtained from Luffa cylindrica
Source: MDPI journal article supplement (doi:10.3390/ma16196577), 2023-10-06
Supplement: s1 [file s1]

# 3D composite U(VI) adsorbents based on alginate hydrogels and oxidized biochar obtained from *Luffa Cylindrica*

Andreas Ayiotis<sup>1</sup>; Efthalia Georgiou<sup>2</sup>; Panagiotis S. Ioannou<sup>1</sup>; Ioannis Pashalidis<sup>2</sup>  
and Theodora Krasia-Christoforou<sup>1\*</sup>

<sup>1</sup> Department of Mechanical and Manufacturing Engineering, University of Cyprus,  
1 Panepistimiou Avenue, 2109, Aglantzia, Nicosia, P. O. Box 20537, 1678 Nicosia, Cyprus; ayi-  
otiss@gmail.com (A.A.); ioannou.s.panagiotis@ucy.ac.cy (P.S.I.)

<sup>2</sup> Department of Chemistry, University of Cyprus,  
1 Panepistimiou Avenue, 2109, Aglantzia, Nicosia, P. O. Box 20537, 1678 Nicosia, Cyprus; georgiou.eftha-  
lia@ucy.ac.cy (E.G.); paschalidis.ioannis@ucy.ac.cy (I.P.)

\* Correspondence: krasia.theodora@ucy.ac.cy

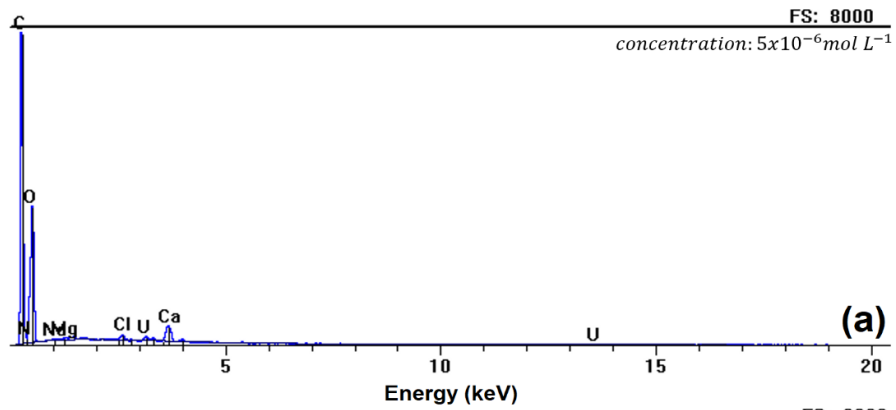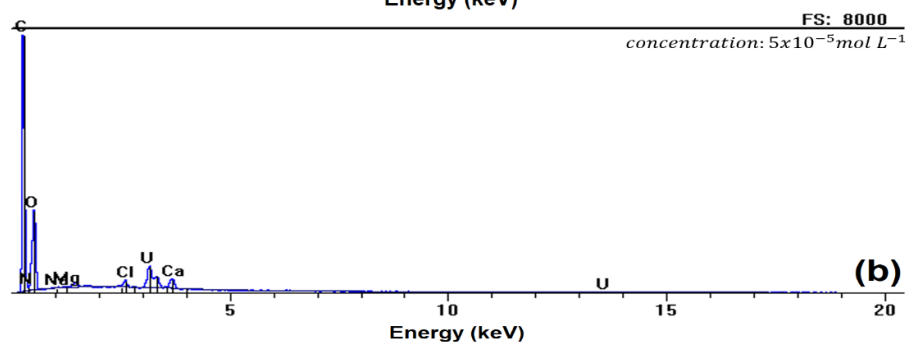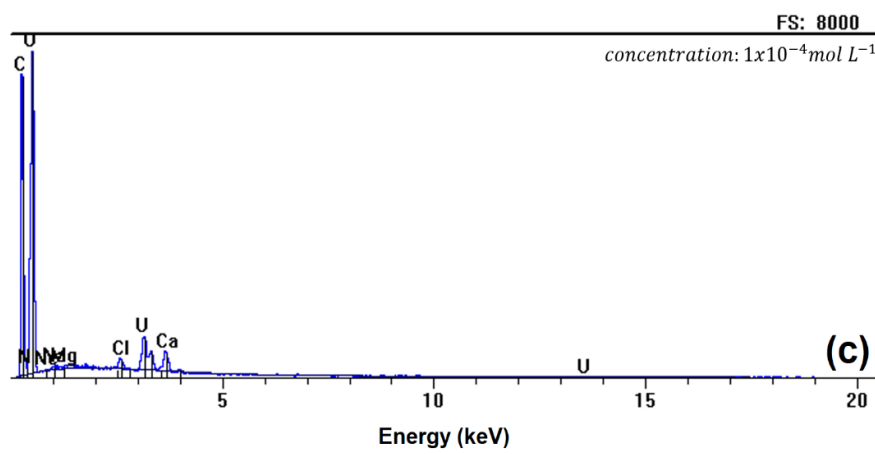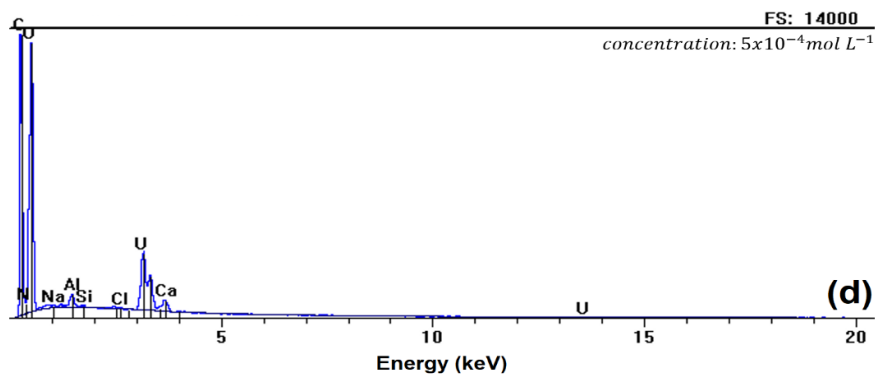

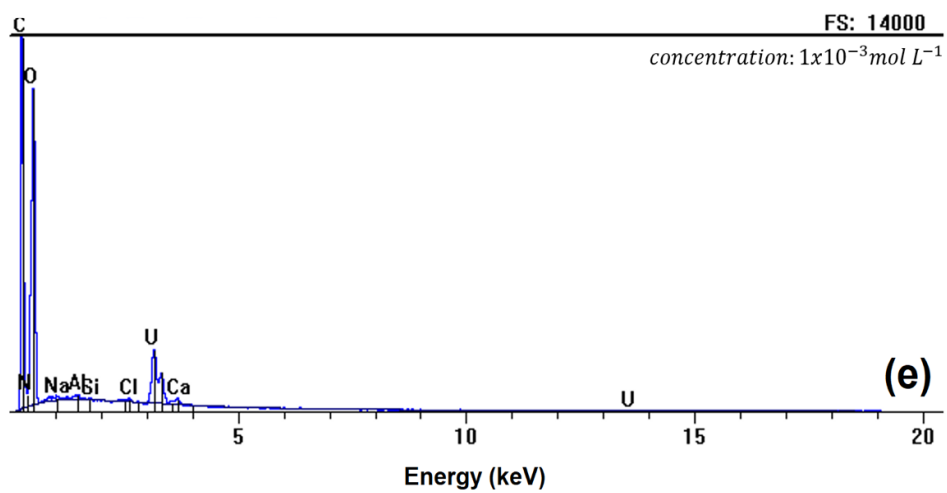

**Figure S1.** Representative EDS spectra of CA/ox-LC samples that have been previously equilibrated with aqueous solutions of U(VI) at varying concentrations: (a)  $5 \times 10^{-6} \text{ M}$ , (b)  $5 \times 10^{-5} \text{ M}$ , (c)  $1 \times 10^{-4} \text{ M}$ , (d)  $5 \times 10^{-4} \text{ M}$  and (e)  $1 \times 10^{-3} \text{ M}$ .
